# Supplementary material for: Sensitivity of tropical woodland savannas to El Niño droughts
Source: Copernicus journal article supplement (doi:10.5194/egusphere-2024-2118), 2024-08-01
Supplement: Supplementary file 1 [file egusphere-2024-2118-supplement.pdf]

## Sensitivity of tropical woodland savannas to El Niño droughts

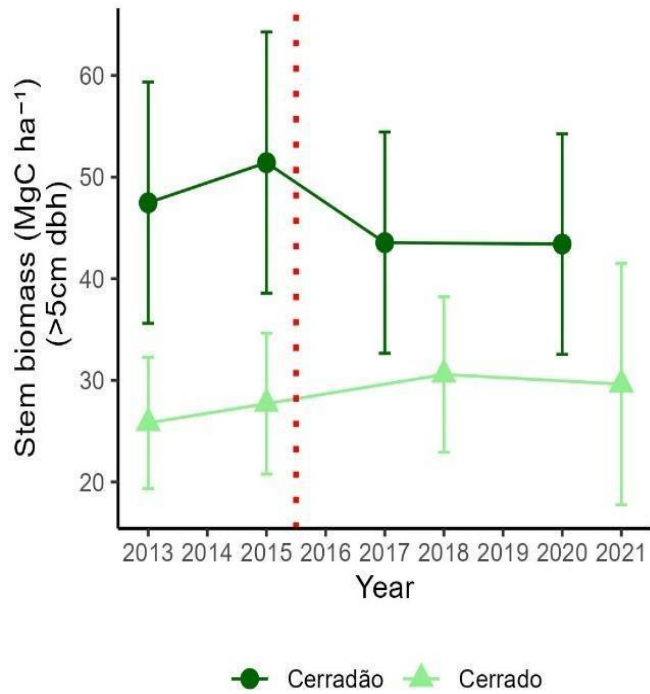

**Figure S1.** Per tree ( $\geq 5$  cm DBH) aboveground biomass carbon stocks from *cerrado* (light green) and *cerradão* (dark green) between 2013 and 2021. The error bars represent the standard error. The dashed red line indicates the El Niño periods.

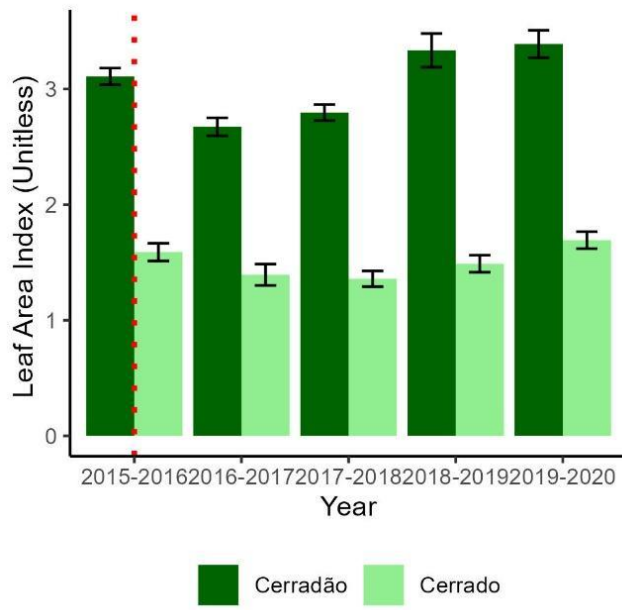

**Figure S2.** Leaf area index, from *cerrado* (light green) and *cerradão* (dark green), with the 1st month of the dry season (May) representing the beginning of each year's climatic calendar. The dashed red line indicates the El Niño periods.

**Table S1.** Climatic data between 2000 and 2020 from *cerrado* and *cerradão*, with the 1st month of the dry season (May) representing the beginning of each year's climatic calendar.

| <b>Years</b> | <b>Months</b> | <b>MCWD<br/>(mm)</b> | <b>Precipitation<br/>(mm)</b> | <b>Maximum<br/>temperature (°C)</b> | <b>Mean temperature<br/>(°C)</b> |
|--------------|---------------|----------------------|-------------------------------|-------------------------------------|----------------------------------|
| 2000-2013    | May-April     | -510.4               | 1461.5                        | 33.6                                | 24.7                             |
| 2013-2014    | May-April     | -526.3               | 1671.9                        | 33.7                                | 25.0                             |
| 2014-2015    | May-April     | -454.9               | 1417.1                        | 34.3                                | 25.1                             |
| 2015-2016    | May-April     | -464.4               | 790.2                         | 35.4                                | 25.8                             |
| 2016-2017    | May-April     | -883.7               | 1580.2                        | 35.1                                | 25.7                             |
| 2017-2018    | May-April     | -584.7               | 1066.7                        | 34.7                                | 25.2                             |
| 2018-2019    | May-April     | -575.4               | 1468.1                        | 34.3                                | 25.4                             |
| 2019-2020    | May-April     | -483.6               | 1444.9                        | 34.2                                | 23.9                             |

**Table S2.** Synthesis of **NPP** values ( $\pm$  S.E.) from *cerrado* and *cerradão* between 2014 and 2019.  $NPP_{AG}$ , aboveground NPP;  $NPP_{BG}$  belowground NPP. All units are Mg C ha<sup>-1</sup> yr<sup>-1</sup>.

|                            | 2014 | S.E. | 2015 | S.E. | 2016 | S.E. | 2017 | S.E. | 2018 | S.E. | 2019 | S.E. | Mean | Error |
|----------------------------|------|------|------|------|------|------|------|------|------|------|------|------|------|-------|
| <b>Cerrado</b>             |      |      |      |      |      |      |      |      |      |      |      |      |      |       |
| NPPlitterfall              | 2.20 | 0.15 | 2.31 | 0.16 | 1.93 | 0.11 | 1.92 | 0.15 | 2.36 | 0.17 | 2.48 | 0.18 | 2.20 | 0.44  |
| NPPleaf                    | 1.94 | 0.16 | 1.95 | 0.16 | 1.67 | 0.11 | 1.66 | 0.15 | 1.99 | 0.16 | -    | -    | 1.84 | 0.37  |
| NPPtwigs                   | 0.12 | 0.01 | 0.13 | 0.01 | 0.11 | 0.01 | 0.14 | 0.01 | 0.16 | 0.02 | -    | -    | 0.13 | 0.03  |
| NPPrep(flower,fruit,seeds) | 0.11 | 0.01 | 0.17 | 0.01 | 0.10 | 0.00 | 0.12 | 0.01 | 0.17 | 0.01 | -    | -    | 0.13 | 0.04  |
| NPPother                   | 0.03 | 0.00 | 0.06 | 0.00 | 0.06 | 0.00 | 0.04 | 0.00 | 0.04 | 0.00 | -    | -    | 0.05 | 0.01  |
| NPPherbivory               | 0.06 | 0.03 | 0.06 | 0.03 | 0.05 | 0.03 | 0.05 | 0.03 | 0.06 | 0.03 | -    | -    | 0.06 | 0.06  |
| NPPbranch turnover         | 0.14 | 0.05 | 0.14 | 0.05 | 0.23 | 0.07 | 0.23 | 0.07 | 0.23 | 0.11 | -    | -    | 0.19 | 0.17  |
| NPPacw $\geq$ 5cm dbh      | 1.16 | 0.12 | 1.31 | 0.13 | 1.31 | 0.13 | 1.31 | 0.13 | 0.38 | 0.04 | 0.38 | 0.04 | 0.98 | 0.48  |
| NPPcoarse root             | 1.59 | 1.09 | 1.79 | 1.23 | 1.79 | 1.23 | 1.79 | 1.23 | 0.52 | 0.36 | 0.52 | 0.36 | 1.34 | 2.57  |
| NPPfine root               | 1.37 | 0.16 | 0.85 | 0.12 | 1.25 | 0.25 | 1.54 | 0.27 | 0.98 | 0.25 |      |      | 1.19 | 0.56  |
| NPP <sub>AG</sub>          | 3.56 | 0.20 | 3.82 | 0.21 | 3.52 | 0.18 | 3.51 | 0.21 | 3.03 | 0.21 |      |      | 3.49 | 0.54  |
| NPP <sub>BG</sub>          | 2.96 | 1.10 | 2.64 | 1.24 | 3.04 | 1.26 | 3.33 | 1.26 | 1.50 | 0.44 |      |      | 2.70 | 2.57  |
| NPP                        | 6.52 | 1.12 | 6.46 | 1.26 | 6.57 | 1.27 | 6.85 | 1.28 | 4.53 | 0.48 |      |      | 6.19 | 2.68  |
| <b>Cerradão</b>            |      |      |      |      |      |      |      |      |      |      |      |      |      |       |
| NPPlitterfall              | 4.29 | 0.22 | 4.14 | 0.23 | 3.62 | 0.11 | 4.27 | 0.18 | 4.28 | 0.21 | 4.37 | 0.14 | 4.16 | 0.52  |
| NPPleaf                    | 3.04 | 0.18 | 3.38 | 0.22 | 2.50 | 0.09 | 3.47 | 0.18 | 2.96 | 0.19 | -    |      | 3.07 | 0.56  |
| NPPtwigs                   | 0.39 | 0.02 | 0.33 | 0.02 | 0.32 | 0.02 | 0.41 | 0.02 | 0.73 | 0.06 | -    |      | 0.44 | 0.18  |
| NPPrep(flower,fruit,seeds) | 0.76 | 0.07 | 0.32 | 0.02 | 0.68 | 0.05 | 0.39 | 0.03 | 0.46 | 0.04 | -    |      | 0.52 | 0.21  |
| NPPother                   | 0.10 | 0.01 | 0.11 | 0.00 | 0.13 | 0.01 | 0.11 | 0.01 | 0.17 | 0.01 | -    |      | 0.12 | 0.03  |
| NPPherbivory               | 0.13 | 0.07 | 0.15 | 0.07 | 0.11 | 0.06 | 0.15 | 0.08 | 0.13 | 0.07 | 0.13 | 0.07 | 0.14 | 0.15  |
| NPPbranch turnover         | 0.49 | 0.41 | 0.49 | 0.41 | 0.49 | 0.41 | 0.49 | 0.41 | 0.49 | 0.41 | 0.49 | 0.41 | 0.49 | 0.92  |
| NPPacw $\geq$ 5cm dbh      | 2.78 | 0.28 | 1.16 | 0.12 | 1.16 | 0.12 | 2.21 | 0.22 | 2.21 | 0.22 | 2.21 | 0.22 | 1.96 | 0.85  |
| NPPcoarse root             | 0.61 | 0.10 | 0.26 | 0.04 | 0.26 | 0.04 | 0.49 | 0.08 | 0.49 | 0.08 | 0.49 | 0.08 | 0.43 | 0.23  |
| NPPfine root               | 0.99 | 0.13 | 1.73 | 0.3  | 1.00 | 0.38 | 0.81 | 0.15 | 0.48 | 0.13 |      |      | 1.00 | 0.71  |
| NPP <sub>AG</sub>          | 7.69 | 0.55 | 5.94 | 0.49 | 5.38 | 0.44 | 7.12 | 0.50 | 7.11 | 0.52 | 7.20 | 0.49 | 6.74 | 1.47  |
| NPP <sub>BG</sub>          | 1.60 | 0.17 | 1.99 | 0.30 | 1.26 | 0.38 | 1.30 | 0.17 | 0.97 | 0.15 |      |      | 1.42 | 0.69  |
| NPP                        | 9.29 | 0.57 | 7.93 | 0.58 | 6.64 | 0.59 | 8.42 | 0.53 | 8.08 | 0.54 |      |      | 8.07 | 1.58  |
